# Supplementary material for: Reduced Blood RGS2 Expression in Mild Cognitive Impairment Patients
Source: Front Aging Neurosci. 2021 Sep 29;13:738244. doi: 10.3389/fnagi.2021.738244 (PMC8513788; doi:10.3389/fnagi.2021.738244)
Supplement: Supplementary file 1 [file Table_1.XLSX]

## Sheet: Sheet1
							(0=Not affected; 1=Affected)
Code	Diagnosis (1=eAD); (0=ctrl)	Sex (0=F, 1=M)	Age	Education (in years)	MMSE T0	MMSE T1	DEPRESSION	ANXIETY	HYPERTENSION	CARDIOPATHIES	ICTUS	DIABETES	Hypercholesterolemia	Hypertriglyceridemia	RGS2 mRNA T0 (2-Dct)	RGS2 mRNA T1 (2-Dct)
ALZ002	1	1	75	5	15		1	0	1	0	1	0	1	0	2.3701
ALZ006	1	1	83	7	27		1	0	1	0	0	0	1	0	1.4136
ALZ007	1	0	76	7	22	20	0	0	1	0	0	1	0	0	2.4232	0.91073
ALZ008	1	0	67	7	25	27	0	0	1	0	0	0	1	0	2.5405	0.2972
ALZ009	1	1	80	7	25		0	1	0	0	0	1	0	0	1.9416
ALZ014	1	1	80	7	23	24	0	0	1	0	0	0	0	0	1.5518	0.183217
ALZ015	1	1	79	14	25	19	0	0	1	0	0	1	0	0	2.9539	0.358958
ALZ017	1	1	73	5	21	23	0	1	0	0	0	0	0	0	1.8551	0.106839
ALZ019	1	1	82	7	22		0	0	1	0	0	0	0	0	1.9231
ALZ021	1	0	73	7	23	24	0	0	0	0	0	0	0	0	1.7202	0.247272
ALZ020	1	1	63	7	27	25	0	0	1	0	0	0	1	0	1.6046	0.232505
ALZ023	1	0	75	7	21		0	0	1	0	0	1	1	0	2.6006
ALZ025	1	1	74	5	21	21	1	1	0	0	0	0	0	0	1.2836	0.403094
ALZ026	1	1	78	7	25	27	0	0	1	0	0	0	0	0	2.0537	0.206661
ALZ029	1	1	81	7	26	25	1	0	1	0	0	0	0	0	3.0564	0.560627
ALZ030	1	1	73	7	26		1	0	0	0	0	0	0	0	2.0261
ALZ033	1	1	72	7	24	20	0	0	1	0	0	1	1	0	1.7491	0.754698
ALZ034	1	1	82	7	23	20	1	1	0	0	0	0	0	0	2.6627	0.754698
ALZ035	1	1	79	7	26	25	1	0	1	0	0	0	1	0	1.3471	0.625738
ALZ039	1	1	83	14	29	26	0	0	0	0	0	0	1	0	2.8206	0.165884
ALZ044	1	0	79	14	25	24	0	0	0	0	0	0	1	0	2.1729	0.629337
ALZ045	1	1	81	7	21		0	0	1	0	0	0	0	0	4.0946
ALZ046	1	1	79	7	21	19	0	0	1	1	0	0	0	0	2.5543	1.06806
ALZ051	1	0	63	14	21	18	0	0	0	0	0	1	1	0	1.6751	1.45925
ALZ053	1	1	68	7	26	24	1	0	0	0	0	0	0	0	2.7567	1.06004
ALZ055	1	1	66	14	24	17	0	0	0	0	0	0	0	0	3.2538	1.78214
ALZ057	1	1	79	7	22		1	1	1	0	0	0	0	0	1.762
ALZ064	1	1	71	7	25	23	0	0	0	0	0	0	1	0	2.8376	2.23628
ALZ065	1	0	80		22	22	0	0	0	0	0	0	1	0	1.6903	3.58043
ALZ068	1	0	75		24	22	0	0	0	0	0	0	1	0	2.8718	2.48062
ALZ074	1	1	69		26	24	0	0	0	0	0	0	0	0	1.9341	3.44338
ALZ080	1	1	73		22	23	0	0	0	1	0	0	0	0	3.0359	5.06526
ALZ089	1	1	76		21	17	0	0	1	0	0	1	0	0	1.1613	4.37258
1F	0	0	69	19	30		0	0	0	1	0	0	0	0	1.3281
2F	0	1	80	19	30		1	1	1	1	0	1	0	0	4.8563
3F	0	1	83	7	30		0	0	0	0	0	1	0	0	3.9513
4F	0	1	81	7	27		0	0	1	0	0	0	0	0	2.3698
5F	0	0	84	7	30		0	0	0	0	0	0	0	0	4.5041
6F	0	0	64	7	30		0	0	1	0	0	0	0	0	5.3593
7F	0	1	63	7	28		0	1	0	1	0	0	0	0	1.1309
8F	0	1	80	14	30		0	0	0	0	0	0	0	0	4.2754
9F	0	1	61	5	28		1	1	1	0	0	0	0	0	2.5377
10F	0	0	72	14	30		0	1	1	0	0	0	0	0	3.7043
11F	0	1	65	7	28		0	0	0	0	0	0	0	0	2.5742
13F	0	1	70	7	30		0	0	0	0	0	0	0	0	4.6821
14F	0	1	75	7	30		0	0	1	1	0	0	0	0	2.1757
15F	0	1	65	14	30		0	0	1	0	0	0	0	0	2.8053
16F	0	0	81	7	28		0	0	0	0	0	1	0	0	2.5123
17F	0	0	71	5	30		0	0	1	0	0	1	0	0	2.0481
18F	0	1	71	14	30		1	0	0	0	0	0	1	0	5.045
19F	0	0	78	7	30		0	0	1	0	0	1	0	0	4.7982
20F	0	0	78	7	30		0	1	0	1	0	1	0	0	7.6295
21F	0	0	86	7	27		0	0	0	0	0	1	0	0	4.4294
22F	0	1	82	7	28		0	1	0	1	0	0	0	0	4.1825
23F	0	1	58	14	30		1	1	0	0	0	0	0	0	3.1812
24F	0	0	84	5	26		0	0	0	1	0	0	1	0	2.9933
25F	0	0	80	7	29		0	1	0	0	0	0	0	0	3.7347
26F	0	1	74	14	30		0	1	0	1	0	0	0	0	6.4077
27F	0	1	72	14	30		0	0	1	0	0	0	1	0	1.6455
28F	0	1	74	7	28		0	0	1	1	0	0	0	0	1.3732
29F	0	0	82	14	29		0	0	1	0	0	0	1	0	2.91
30F	0	0	78	14	29		0	0	1	0	0	0	0	0	1.9315
31F	0	1	78	7	30		0	0	0	1	0	0	0	0	1.1502
32F	0	0	81	7	30		0	0	1	0	0	0	1	0	1.8181
33F	0	1	73	5	28		1	0	1	0	0	0	1	0	5.309
35F	0	1	71	7	30		0	0	0	0	0	0	1	0	7.1708
37F	0	1	68	7	29		1	1	1	0	0	1	0	0	1.8861
38F	0	1	62	19	30		0	0	0	0	0	0	0	0	6.6883
39F	0	0	72	5	30		0	0	0	0	0	0	0	0	5.1084
40F	0	0	73	7	30		0	0	1	0	0	0	0	0	2.4675
J175	1	0	76	3	21		1	1	1	1	0	1	1	0	0.8414
J177	1	1	77	14	26		0	0	0	1	0	1	0	0	2.611
J186	1	0	78	6	23		0	0	0	0	0	0	1	0	2.6235
J196	1	0	75	10	26		0	0	1	0	0	0	1	0	2.2743
J197	1	1	69	4	26		0	0	0	1	0	0	0	0	1.7242
J198	1	1	75	18	28		0	0	0	0	0	0	1	0	1.7426
J204	1	0	72	14	22		1	1	1	0	0	0	1	0	1.6057
J206	1	1	68	13	28		0	0	1	0	0	0	1	0	1.8444
J209	1	1	77	10	22		0	0	1	0	0	0	1	0	2.5043
J216	1	1	74	18	30		0	0	1	0	0	0	0	0	2.3888
J225	1	0	83	8	27		0	0	0	0	0	0	1	0	3.5735
J234	1	1	76	6	29		0	0	0	0	0	1	1	0	2.8709
J235	1	1	75	12	21		0	0	1	1	1	1	1	0	1.3241
J236	1	0	79	8	26		1	0	0	0	0	0	0	0	0.1933
J237	1	0	68	16	24		1	0	0	0	0	0	0	0	0.8096
J238	1	1	81	6	18		0	0	1	0	0	0	1	0	2.3256
J240	1	0	74	8	24		0	1	1	0	0	0	0	0	2.2584
J241	1	0	78	8	22		0	0	1	0	0	0	1	0	2.3974
J242	1	0	76	10	28		0	0	0	0	0	0	0	0	3.4404
J250	1	0	78	6	20		0	0	0	0	0	0	0	0	2.5659
J251	1	0	75	2	22		0	0	1	0	0	0	1	0	2.7494
J253	1	1	79	18	28		0	0	1	0	0	0	0	0	2.2535
J254	1	0	73	15	26		1	1	1	0	0	0	0	0	1.5842
J258	1	0	75	10	23		0	0	1	0	0	0	1	0	1.9681
J259	1	1	77	18	27		0	0	1	0	0	0	1	0	4.0892
J260	1	0	79	6	23		1	0	1	0	0	0	1	0	1.2484
J261	1	0	70	11	27		0	1	1	0	0	0	1	0	2.1531
J263	1	1	73	6	20		0	0	1	0	0	0	1	0	1.2488
J264	1	1	76	17	29		0	0	0	1	1	0	1	0	2.2993
J267	1	1	74	6	25		0	0	0	0	0	0	0	0	2.01
J268	1	1	83	14	26		0	1	0	0	0	1	0	0	1.1078
J269	1	0	76	9	29		0	0	1	0	0	0	0	0	3.0149
J270	1	1	76	10	23		0	0	0	0	0	0	0	0	0.6231
J271	1	0	75	8	13		0	0	1	0	0	0	0	0	1.6457
J273	1	0	78	9	25		0	0	0	0	0	0	1	0	2.0206
J274	1	1	84	18	27		0	0	1	1	0	0	1	0	3.1477
J178 C	0	0	71	6	29		0	0	0	0	0	0	1	0	1.8649
J179C	0	0	72	13	28		1	0	0	0	0	0	0	0	4.0568
J181 C	0	0	87	8	29		0	0	1	0	0	1	1	0	2.7742
J182C	0	0	81	6	27		0	0	0	0	0	0	0	0	3.402
J183C	0	0	85	10	29		0	0	0	0	0	0	0	0	4.0084
J185C	0	1	71	8	30		0	0	0	0	0	0	0	0	1.6709
J188C	0	0	75	6	28		0	0	1	0	0	1	1	0	2.6297
J193C	0	0	69	15	29		1	0	0	0	0	0	1	0	3.2856
J217C	0	0	65	8	30		0	0	0	0	0	0	0	0	2.8485
J229C	0	0	67	10	28		0	0	1	1	0	0	1	0	2.9499
J230C	0	0	63	8	30		0	1	0	0	0	0	0	0	2.0092
J231C	0	1	63	8	25		0	0	0	0	0	0	1	1	5.4854
J252C	0	0	65	18	27		0	0	0	0	0	0	0	0	2.6483
